# Supplementary material
Source: PubMed Central journal article supplement (PMC3078189)
Supplement: NIHMS279683-supplement-2.pdf [file NIHMS279683-supplement-2.pdf]

Supplementary Table 1

**Ectopic expression of SF in the highly metastatic mouse mammary tumor cell line Mvt-1****up-regulates the expression of genes up-regulated in G3-grade tumors**

| Gene<br>Symbol | Mouse Homolog<br>Symbol | Mouse Gene Full Name                                                   | Probe Set                    | Fold<br>Change* |
|----------------|-------------------------|------------------------------------------------------------------------|------------------------------|-----------------|
| ANLN           | Anln                    | Anillin, actin binding protein                                         | <a href="#">1433543_at</a>   | 10.95           |
| BRRN1          | Ncaph                   | Non-SMC condensin I complex,<br>subunit H                              | <a href="#">1423920_at</a>   | 4.12            |
| C6ORF173       | 2610036L11Rik           | RIKEN cDNA 2610036L11 gene                                             | <a href="#">1453053_at</a>   | 3.04            |
| CDCA3          | CdcA3                   | Cell division cycle associated 3                                       | <a href="#">1452040_a_at</a> | 9.33            |
| CDCA5          | CdcA5                   | Cell division cycle associated 5                                       | <a href="#">1416802_a_at</a> | 8.28            |
| CDCA8          | Cdca8                   | Cell division cycle associated 8                                       | <a href="#">1428480_at</a>   | 8.60            |
| CENPE          | Cenpe                   | Centromere protein E                                                   | <a href="#">1439040_at</a>   | 12.46           |
| FJL11029       | Prr11                   | Proline rich 11                                                        | <a href="#">1444257_at</a>   | 5.59            |
| FOXM1          | Foxm1                   | Forkhead box M1                                                        | <a href="#">1448834_at</a>   | 7.92            |
| MELK           | Melk                    | Maternal embryonic leucine zipper<br>kinase                            | <a href="#">1416558_at</a>   | 11.31           |
| MYBL2          | Mybl2                   | Myeloblastosis oncogene-like 2                                         | <a href="#">1417656_at</a>   | 7.07            |
| SPC24          | Spc24                   | SPC24, NDC80 kinetochore complex<br>component, homolog (S. cerevisiae) | <a href="#">1431087_at</a>   | 12.93           |
| STK6           | Aurka                   | Aurora kinase A                                                        | <a href="#">1424511_at</a>   | 13.24           |
| TPX2           | Tpx2                    | TPX2, microtubule-associated protein<br>homolog (Xenopus laevis)       | <a href="#">1428104_at</a>   | 11.25           |
| TTK            | Ttk                     | Ttk protein kinase                                                     | <a href="#">1449171_at</a>   | 12.98           |

\*Fold difference between Mvt-1/SF and Mvt-1 control cell lines
